# Supplementary material for: Cu-doped mesoporous SnO2 nanoparticles with rich grain boundaries and oxygen vacancies for photocatalytic CO2-to-CO conversion
Source: Royal Society of Chemistry journal article supplement (doi:10.1039/d3cp02160b), 2023-01-01
Supplement: d3cp02160b1.pdf [file d3cp02160b1.pdf]

## SUPPORTING INFORMATION

### **Cu-Doped Mesoporous SnO<sub>2</sub> Nanoparticles with Rich Grain Boundaries and Oxygen Vacancies for Photocatalytic CO<sub>2</sub>-to-CO Conversion**

*Guohui Li,<sup>a,b</sup> Pengyu Li,<sup>a</sup> Zhi Ge,<sup>a</sup> Dawei Yan,<sup>c</sup> Wei Sun,<sup>a</sup> Yuanyuan Sun<sup>\*a</sup> and Xiaoxia Zhou<sup>d</sup>*

*<sup>a</sup> Key Laboratory of Laser Technology and Optoelectronic Functional Materials of Hainan Province, Key Laboratory of Functional Materials and Photoelectrochemistry of Haikou, College of Chemistry and Chemical Engineering, Hainan Normal University, 571158 Haikou, China*

*<sup>b</sup> School of Science, Qiongtai Normal University, 571127 Haikou, China*

*<sup>c</sup> Shanghai New Tobacco Product Research Institute Co. LTD, Shanghai , 201315, China.*

*<sup>d</sup> State Key Laboratory of High Performance Ceramics and Superfine Microstructures, Shanghai Institute of Ceramics, Chinese Academy of Sciences, 1295 Dingxi Road, Shanghai 200050, China.*

*\*Corresponding author: Yuanyuan Sun      Email: sunyuanyuan@hainnu.edu.cn*

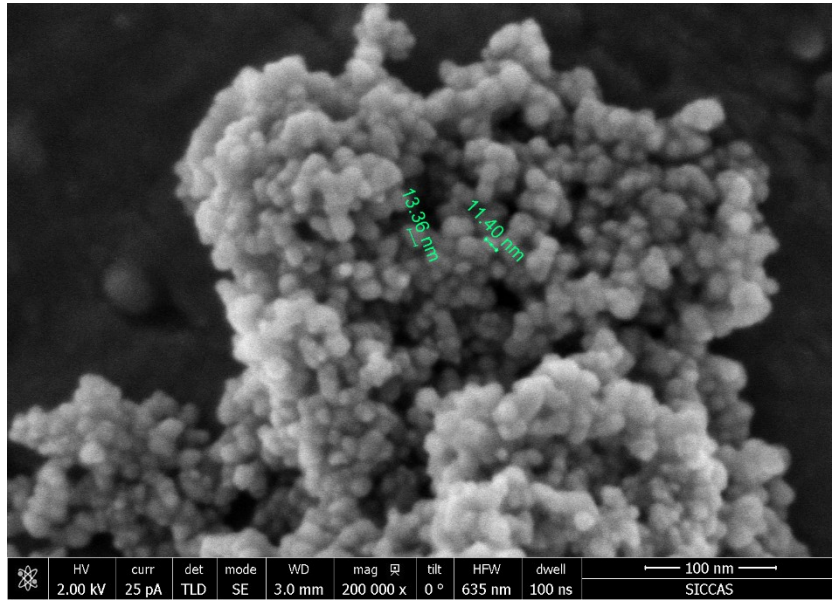

**Figure S1.** The high-magnification SEM image of the sample Cu(1)-SnO<sub>2</sub>.

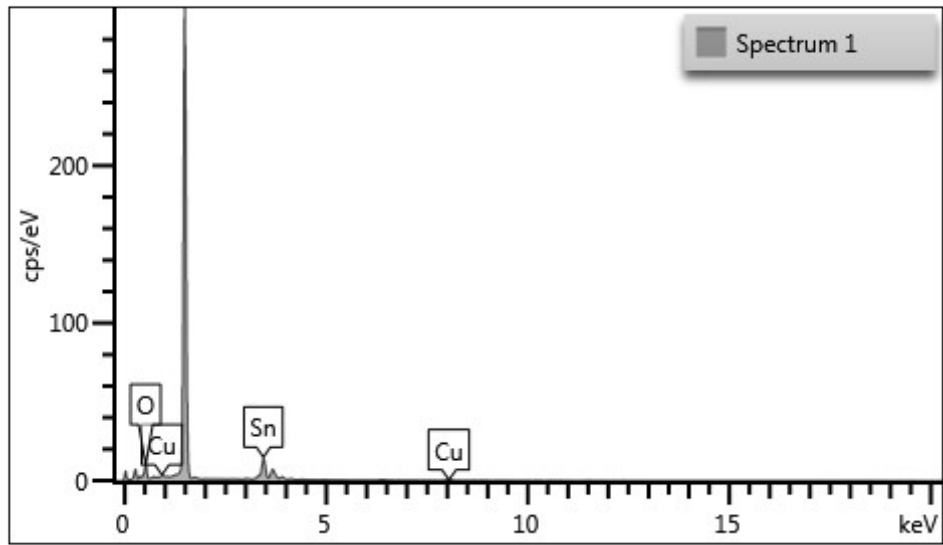

**Figure S2.** The corresponding EDX spectrum of the optimal sample Cu(1)-SnO<sub>2</sub>.

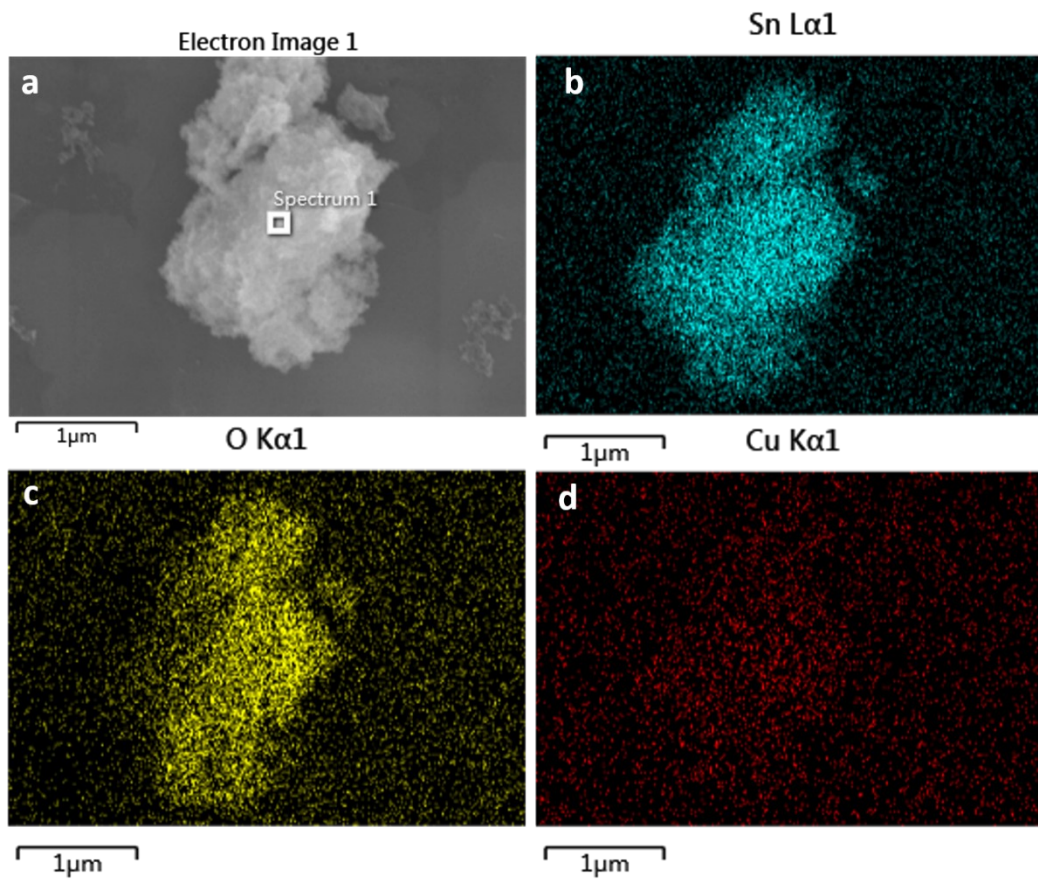

**Figure S3.** The SEM images and the corresponding element mapping images of Cu(2)-SnO<sub>2</sub>.

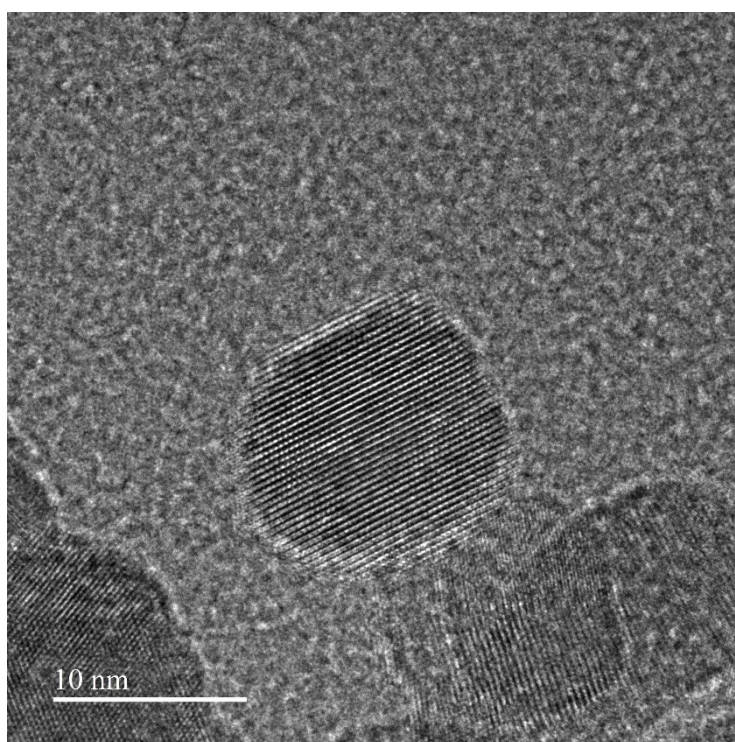

**Figure S4.** The high-magnification TEM image of the sample Cu(1)-SnO<sub>2</sub>.

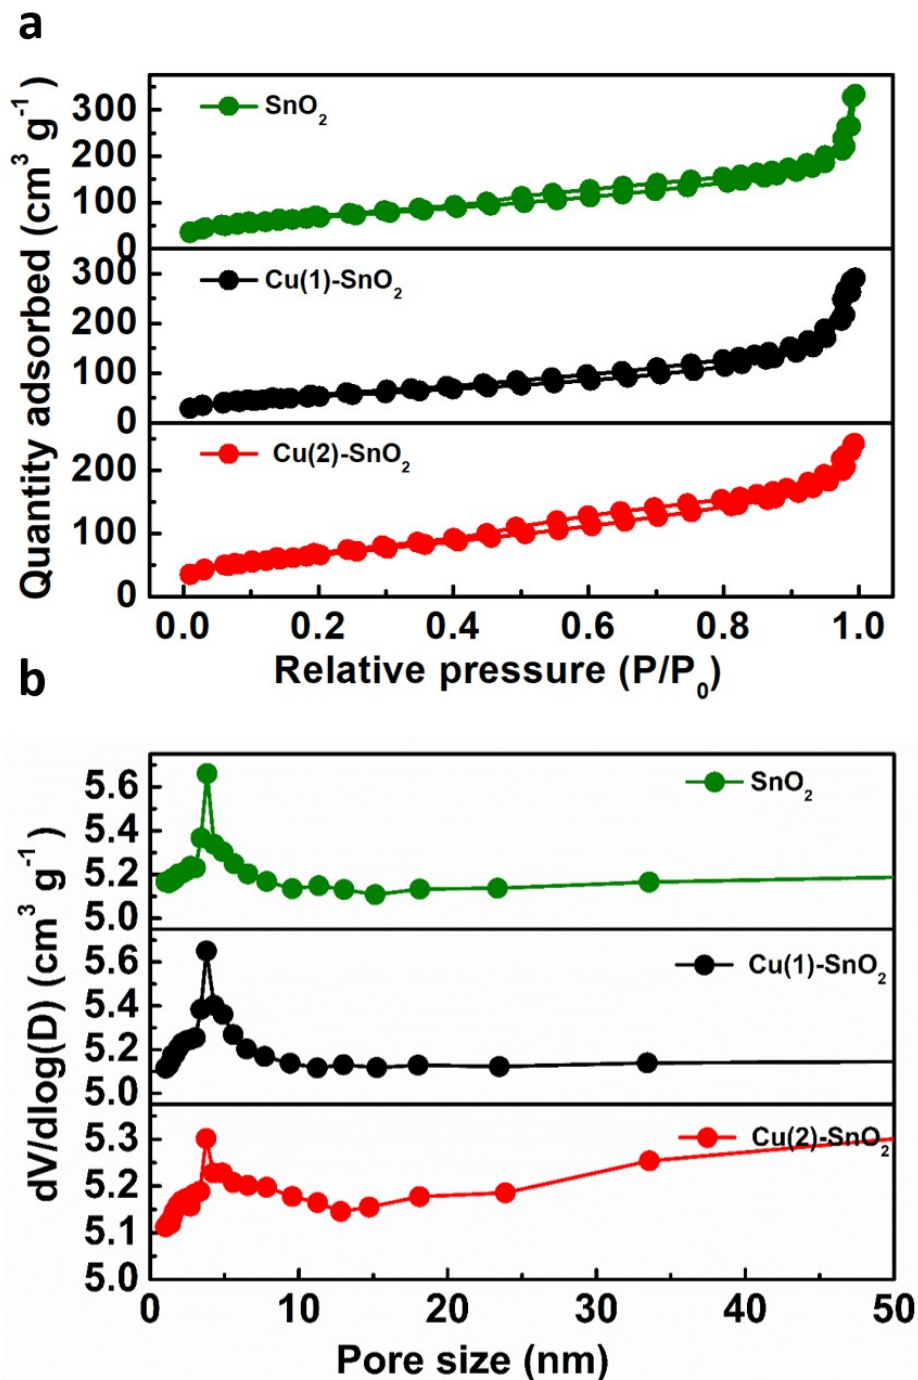

**Figure S5.** The curves of a)  $\text{N}_2$  adsorption-desorption and b) the corresponding pore size distribution for the catalysts  $\text{SnO}_2$ ,  $\text{Cu(1)-SnO}_2$  and  $\text{Cu(2)-SnO}_2$ .

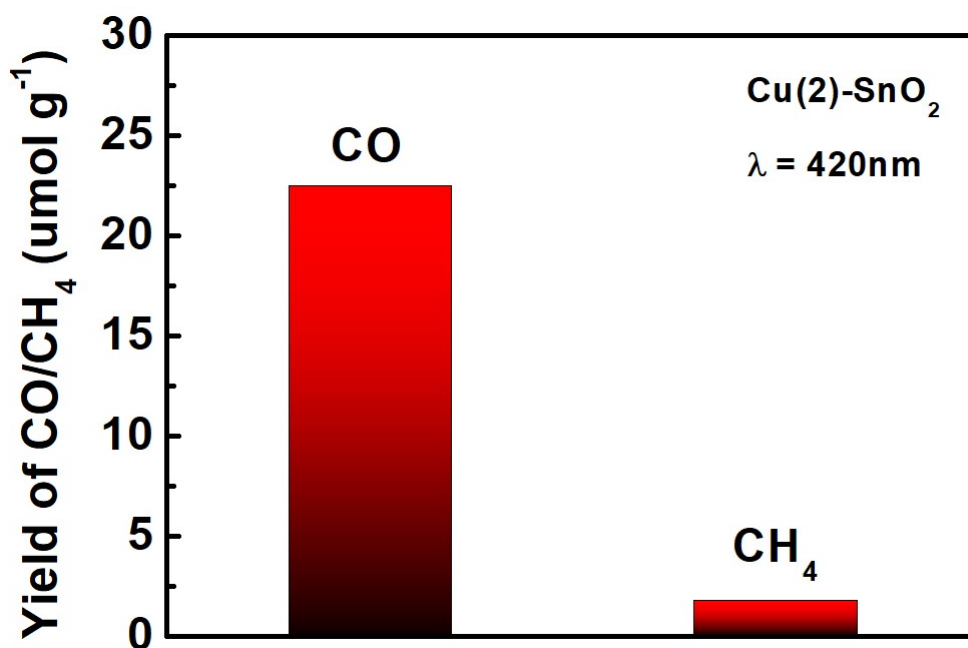

**Figure S6.** The photocatalytic CO<sub>2</sub> reduction performance on the sample Cu(2)-SnO<sub>2</sub> under Xe lamp irradiation with light wavelength of 420 nm in 1 h.

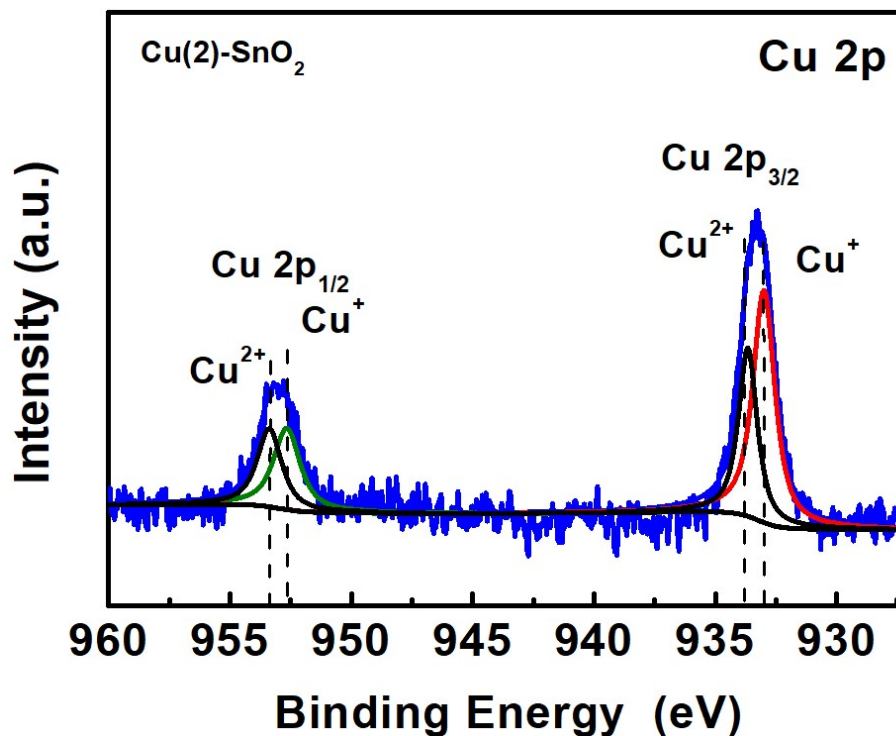

**Figure S7.** X-ray photoelectron spectroscopy (XPS) spectra of Cu 2p of the sample Cu(2)-SnO<sub>2</sub> after catalytic reaction.

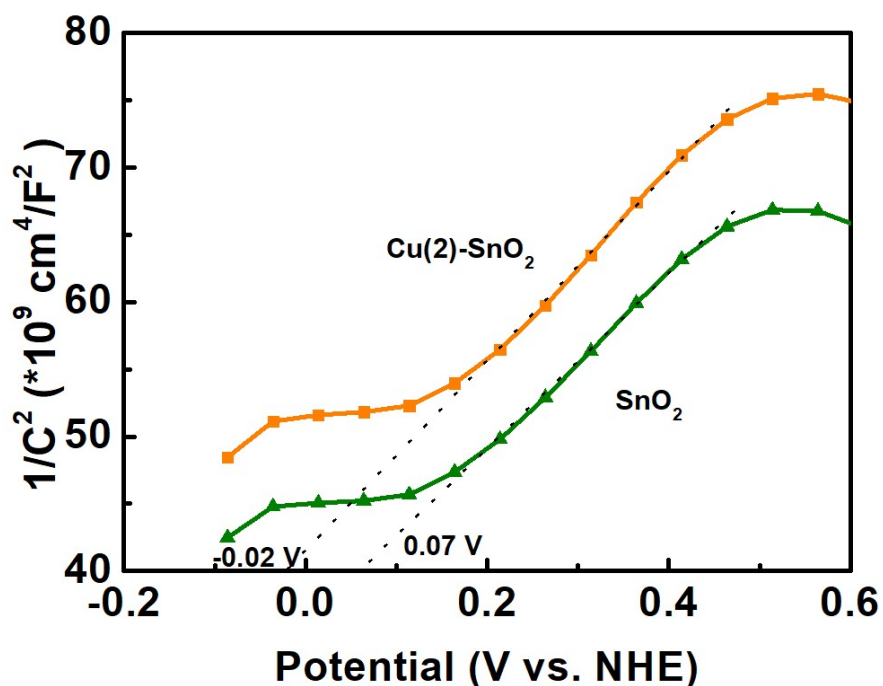

**Figure S8.** Mott-Schottky plots of the samples SnO<sub>2</sub> and Cu(2)-SnO<sub>2</sub>.

**Table S1.** The textural properties and composition content of the samples SnO<sub>2</sub>, Cu(1)-SnO<sub>2</sub> and Cu(2)-SnO<sub>2</sub>.

| Samples                | $V_{total}$<br>[cm <sup>3</sup> g <sup>-1</sup> ] | $S_{total}$<br>[m <sup>2</sup> g <sup>-1</sup> ] | $d_{meso}$<br>[nm] | Cu (XPS)<br>[at. %] | Cu (ICP-AES)<br>[at. %] |
|------------------------|---------------------------------------------------|--------------------------------------------------|--------------------|---------------------|-------------------------|
| SnO <sub>2</sub>       | 0.51                                              | 234                                              | 3.7                | -                   | -                       |
| Cu(1)-SnO <sub>2</sub> | 0.46                                              | 228                                              | 3.7                | 0.95                | 1.02                    |
| Cu(2)-SnO <sub>2</sub> | 0.44                                              | 177                                              | 3.8                | 1.83                | 1.96                    |



**Table S2.** CO yield and the selectivity of the samples SnO<sub>2</sub>, Cu(1)-SnO<sub>2</sub> and Cu(2)-SnO<sub>2</sub> in 4h under UV-vis light irradiation.

| Samples                | <i>CO yield</i>            | <i>CO selectivity</i> |
|------------------------|----------------------------|-----------------------|
|                        | [ $\mu\text{mol g}^{-1}$ ] | [%]                   |
| SnO <sub>2</sub>       | 30                         | 80.54                 |
| Cu(1)-SnO <sub>2</sub> | 91                         | 90.02                 |
| Cu(2)-SnO <sub>2</sub> | 107                        | 90.37                 |
